# The Sub-lithospheric Source of North Atlantic Basalts: Evidence for, and Significance of, a Common End-member

R. M. ELLAM\* AND F. M. STUART

SCOTTISH UNIVERSITIES ENVIRONMENTAL RESEARCH CENTRE, SURRC, EAST KILBRIDE G75 0QF, UK

RECEIVED SEPTEMBER 1, 1999; REVISED TYPESCRIPT ACCEPTED FEBRUARY 7, 2000

*Palaeogene basalts from the margins of the North Atlantic often show geochemical variations that are consistent with their parental magmas having interacted with the lithosphere en route to the Earth's surface. These geochemical trends vary depending on the nature of the local lithospheric contaminants. Using examples from the British Tertiary Igneous Province and SE Greenland, we construct coherent contamination trends, which converge on a restricted Pb isotope composition, apparently indicating a common uncontaminated asthenospheric mantle component. Significantly, this composition is also suitable as one end-member of the Pb isotope arrays recorded in Recent Icelandic basalts. We conclude that this composition has been a persistent component of the Iceland plume over 60 my, dominating the mantle contribution to the Palaeocene phase of flood basalt magmatism but constituting only one end-member on Iceland. The Pb isotope composition of this 'North Atlantic end-member' is consistent with, but not necessarily demanding of, a primordial source. Recent evidence suggesting a lower-mantle origin for mantle plumes encourages investigation of whether the geochemical evidence supports that hypothesis. Helium isotope data from Palaeogene North Atlantic basalts support a lower-mantle contribution. However, mixing models suggest that it is unlikely that the lower-mantle contribution is large enough to dominate the Sr–Nd–Pb isotope compositions and lithophile trace element signatures of any plume-derived basalts.*

KEY WORDS: *North Atlantic; Iceland; lower mantle; mantle plumes; flood basalts; isotopes*

## INTRODUCTION

Continental flood basalts (CFB) have  $^{87}\text{Sr}/^{86}\text{Sr}$ ,  $^{143}\text{Nd}/^{144}\text{Nd}$  and Pb isotope ratios that are considerably more

variable than those of mid-ocean ridge basalts (MORB) and ocean island basalts (OIB). Although the convecting mantle beneath continents is likely to be as heterogeneous as that beneath oceans, there is no obvious reason why it would be any more variable. The obvious corollary is that the additional isotopic heterogeneity is derived from the continent itself; either from the continental crust or the lithospheric mantle keel.

Characterization of sub-lithospheric mantle has therefore tended to concentrate on oceanic basalts, thereby minimizing the possibility of additional complication through continental lithospheric contamination—although the possibility remains that some of the OIB Sr–Nd–Pb isotope variation reflects a contribution from remnants of continental lithosphere in the upper mantle (e.g. Hawkesworth *et al.*, 1986; Kamber & Collerson, 1999). However, there may be insights into the deep mantle that are available only by studying the voluminous continental flood basalt provinces. To exploit such information requires us to understand, quantify and ultimately strip away the effects of high-level differentiation and lithospheric interaction leaving a 'window' into sub-lithospheric sources and processes.

As more CFB provinces have been subjected to petrological and geochemical studies, distinguishing crustal contamination from 'remobilization' of enriched lithospheric mantle material has become a major pre-occupation. Much effort has been expended in using the increasingly readily available isotope and trace element tracers to characterize the high  $^{87}\text{Sr}/^{86}\text{Sr}$ , low  $^{143}\text{Nd}/^{144}\text{Nd}$  'enriched' end-members and assess the relative likelihood that they are derived from crustal or enriched sub-continental mantle sources. Consensus has been slow

\*Corresponding author. Telephone: +44-1355-223332. Facsimile: +44-1355-229898. E-mail: r.ellam@surrc.gla.ac.uk

to develop and the crustal contamination vs enriched mantle debate was often polemic. However, persuasive examples of both crustal and lithospheric contaminants are now documented and there can be little doubt that both crustal contamination and entrainment of enriched lithospheric mantle are valid processes in continental basalt petrogenesis (e.g. Carlson *et al.*, 1984; Hawkesworth *et al.*, 1984; Menzies *et al.*, 1984; Devey & Cox, 1987; Ellam & Cox, 1991; Ellam *et al.*, 1992).

Less tractable perhaps has been the sub-lithospheric contribution to CFB. Very few CFB have radiogenic isotope signatures that overlap the fields for MORB and OIB. This may merely indicate the rarity of CFB that have not interacted with continental lithosphere (e.g. Thompson *et al.*, 1983). Alternatively, it may suggest that asthenospheric sources have not contributed to these CFB, with the implication that wholesale melting of lithospheric mantle has produced many CFB (e.g. Turner *et al.*, 1996). One notable exception is the North Atlantic Igneous Province (NAIP) in which Palaeogene rift-related continental magmatism around the North Atlantic margin has given way to oceanic hotspot activity at Iceland today. Comparison of the Sr, Nd and Pb isotope compositions of the Palaeogene CFB and the Iceland OIB indicate that many of the former interacted strongly with the rifting continental lithosphere (Moorbath & Thompson, 1980; Dickin, 1981; Gariépy *et al.*, 1983; Thirlwall & Jones, 1983; Thirlwall *et al.*, 1994; Wallace *et al.*, 1994; Kerr *et al.*, 1995; Fram & Leshner, 1997; Lightfoot *et al.*, 1997; Fitton *et al.*, 1998; Hansen & Nielsen, 1999). Nevertheless, several of the Tertiary lavas have relatively low  $^{87}\text{Sr}/^{86}\text{Sr}$  and high  $^{143}\text{Nd}/^{144}\text{Nd}$ , which approach Icelandic compositions and suggest that largely uncontaminated basalts are present, which may allow us to identify a sub-lithospheric contribution and comment on its origins.

In this contribution we present new Pb isotope data for NAIP basalts from Northern Ireland, which we refer to as the Antrim basalts (Fig. 1) following common local terminology, although minor outcrops of Palaeogene basalts are found outside County Antrim. The petrography, major and trace element compositions and Sr–Nd isotope geochemistry of these samples have been described previously (Wallace *et al.*, 1994; Wallace, 1995). A similar dataset sampling many of the same outcrops and sections has also been presented by Barrat & Nesbitt (1996). In addition, we present new Sr and Nd isotope data for lavas and intrusives from the Isle of Skye, NW Scotland (Fig. 1), which were previously analysed for elemental concentrations and He and Pb isotope ratios (Stuart *et al.*, 2000). The Skye samples were chosen for their high proportion of fresh olivine phenocrysts to facilitate He isotope measurements. Sr and Nd isotope measurements were made on whole-rock powders prepared before olivine separation but, in view of the high

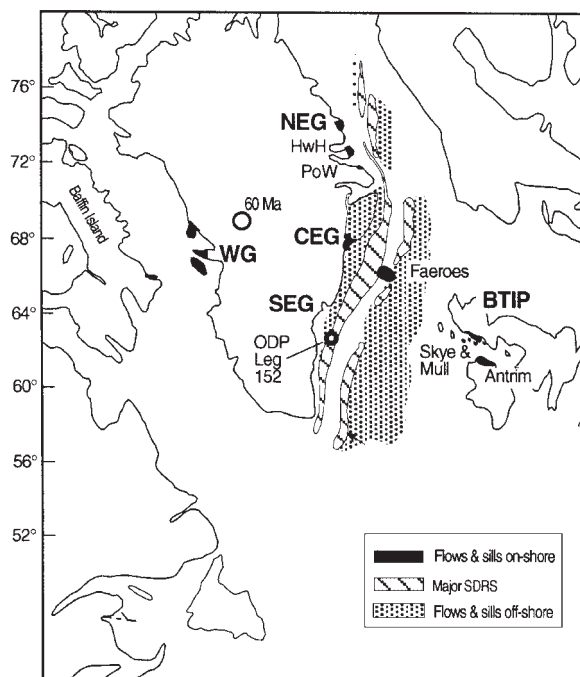

**Fig. 1.** Locality map with palaeogeography reconstructed at *c.* 55 Ma (after Saunders *et al.*, 1997). Bold text labels define the various sub-provinces identified within the North Atlantic Igneous Province: NEG, North East Greenland; CEG, Central East Greenland; SEG, South East Greenland; WG, West Greenland; BTIP, British Tertiary Igneous Province. Plain text labels identify specific localities within the sub-provinces: HwH, Hold with Hope; PoW, Prince of Wales Mountains. Circle in central Greenland is the proposed position of the Iceland plume at 60 Ma (Lawver & Müller, 1994). SDRS, seaward-dipping reflector sequence.

olivine contents, it is possible that the whole rocks do not represent liquid compositions. New He and Pb isotope determinations are presented for picrites from the Prince of Wales Mountains in NE Greenland (Fig. 1). Petrography, major and trace element compositions and Sr–Nd isotope geochemistry of the Prince of Wales Formation were reported by Brown *et al.* (1996) but, again, the samples selected for He isotope measurements were chosen on the basis of their olivine content rather than the availability of other geochemical data.

The new data are combined with the literature database, to investigate the extent to which we can indeed quantify and strip away relatively high-level processes and thereby reveal the sub-lithospheric involvement in Tertiary North Atlantic magmatism, and compare it with the intra-oceanic magmatism at Iceland today. More specifically, we exploit differences in the intra-lithospheric evolution of various basalts from the NAIP to ‘see through’ to uncontaminated isotopic compositions. The results suggest remarkably similar primary magmas that appear to implicate a common sub-lithospheric component in the petrogenesis of North Atlantic basalts from

60 Ma to the present day. We discuss the nature and likely origin of this common end-member. Above all, in the North Atlantic at least, we demonstrate that the pre-break-up CFB carry important information about their deep mantle origins, which are complementary to those available from Iceland OIB and critical to unravelling the full temporal and spatial history of plume-related magmatism.

## NORTH ATLANTIC IGNEOUS PROVINCE: ISOTOPE GEOCHEMISTRY

A thorough and up-to-date review of North Atlantic magmatism has been presented by Saunders *et al.* (1997). We follow their precedent by dividing the region into a series of sub-provinces (Fig. 1) for the purposes of data presentation and comparison. Our first-order observations are drawn from the British Tertiary Igneous Province (BTIP) and SE Greenland sub-provinces (Fig. 1).

### Antrim basalts

The Antrim basalts are the most areally extensive remnant of the BTIP. The lava pile has been subdivided into Upper and Lower Basalt Formations and the Interbasaltic Formation, which represents a period of relative volcanic quiescence during which *in situ* laterites were formed (Old, 1975). The relatively minor Interbasaltic Formation magmatism includes eruption of the compositionally distinct Causeway Tholeiite Member. The magmatism is mostly tholeiitic, although occasional nepheline-normative flows occur (Lyle, 1980), and mostly mafic, but with minor differentiated tholeiitic andesites and occasional rhyolites (Wallace *et al.*, 1994).

Isotope data for the Tertiary lavas of Northern Ireland are a compilation of the data of Wallace *et al.* (1994), Wallace (1995) and new Pb isotope determinations (Table 1). As demonstrated previously (Wallace *et al.*, 1994; Barrat & Nesbitt, 1996) there are correlations between isotopic composition and major and trace element differentiation indices in the Antrim basalts. For example (Fig. 2a), the two Antrim lava series that show substantial MgO variation in our database (Lower Basalt Formation and Causeway Tholeiite Member) appear to evolve increasing initial Sr isotope composition ( $^{87}\text{Sr}/^{86}\text{Sr}_i$ ) with decreasing MgO; although the trends are not collinear and that for the Causeway tholeiites is most striking. Significantly, it is the more differentiated samples of each series that show elevated  $^{87}\text{Sr}/^{86}\text{Sr}_i$  isotope composition. If we make the (reasonable) assumption that high  $^{87}\text{Sr}/^{86}\text{Sr}_i$  is a reflection of the incorporation of lithospheric

material (either crust or mantle), then that incorporation seems to have progressed as the magmas differentiated and is thereby analogous to the assimilation-fractional crystallization (AFC) contamination mechanism. In the case of Antrim we do not claim to have necessarily discriminated crust from lithospheric mantle contaminants with any certainty. However, our purpose here is to 'see through' both crustal and lithospheric mantle contamination to sub-lithospheric mantle source compositions. Thus, when we are confident that contamination effects occurred in the continental crust we will refer to them as 'crustal contamination'. Elsewhere we will refer to a 'lithospheric' contribution without any implication that the contaminant was either crust or mantle lithosphere.

Pb–Sr isotope co-variations (Fig. 2b) are fairly coherent in the Antrim samples, with both the Upper and Lower Basalt Formations defining a positive  $^{87}\text{Sr}/^{86}\text{Sr}$ – $^{206}\text{Pb}/^{204}\text{Pb}$  trend, which implies that the contaminant inferred from the radiogenic Sr had elevated  $^{206}\text{Pb}/^{204}\text{Pb}$ . The four Causeway Tholeiite Member samples lie off the Upper–Lower basalt trend, but also show radiogenic Pb associated with high  $^{87}\text{Sr}/^{86}\text{Sr}$ . Thus, in Pb–Pb isotope space (Fig. 3a and e), where the Antrim lavas define linear arrays, it is the radiogenic Pb that is associated with high  $^{87}\text{Sr}/^{86}\text{Sr}_i$  (and, indeed, low  $^{143}\text{Nd}/^{144}\text{Nd}_i$ ) and apparently most affected by lithospheric contamination. By contrast, the less contaminated samples are characterized by relatively unradiogenic Pb.

### Comparisons with other NAIP lavas

The Antrim Pb isotope data are in marked contrast to Pb isotope data for other BTIP occurrences. For example, Pb isotope data from Skye (Dickin *et al.*, 1981) and Mull (Kerr *et al.*, 1995) define spectacular Pb–Pb arrays (Fig. 3a and e), which have been attributed to contamination of mantle-derived magmas by Archaean granulite facies (Lewisian) continental crust; the extremely unradiogenic Pb of the contaminant reflecting ancient U depletion thought to occur during granulite facies metamorphism. Similar data arrays (Fig. 3a and e), albeit slightly less coherent, were observed for basalts from the Ocean Drilling Program (ODP) Leg 152 cores (Fig. 1) drilled into the basalt flows that constitute the seaward-dipping seismic reflectors of the SE Greenland margin at 63°N (Fitton *et al.*, 1998). Again, the trends towards unradiogenic Pb were attributed to contamination with ancient U-depleted granulite facies crust.

Thus, in the Skye, Mull and ODP Leg 152 cases, crustal contamination is thought to result in unradiogenic Pb and the least contaminated samples are those with highest  $^{206}\text{Pb}/^{204}\text{Pb}$ . By contrast, in Antrim, the lithospheric contaminant (identified on the basis of elevated

Table 1: Pb isotope compositions of lavas from Antrim, Northern Ireland

| Sample                           | $^{206}\text{Pb}/^{204}\text{Pb}_{(i)}$ | $^{207}\text{Pb}/^{204}\text{Pb}_{(i)}$ | $^{208}\text{Pb}/^{204}\text{Pb}_{(i)}$ |
|----------------------------------|-----------------------------------------|-----------------------------------------|-----------------------------------------|
| <i>Lower Basalt Formation</i>    |                                         |                                         |                                         |
| PL43                             | $17.607 \pm 10$                         | $15.441 \pm 11$                         | $37.522 \pm 21$                         |
| JP117                            | $18.149 \pm 8$                          | $15.531 \pm 9$                          | $38.165 \pm 35$                         |
| PL55                             | $18.676 \pm 7$                          | $15.622 \pm 7$                          | $38.744 \pm 18$                         |
| GBY-2                            | $17.971 \pm 10$                         | $15.450 \pm 8$                          | $37.690 \pm 21$                         |
| GBY-4                            | $18.260 \pm 7$                          | $15.589 \pm 6$                          | $38.153 \pm 18$                         |
| GBY-5                            | $18.511 \pm 10$                         | $15.589 \pm 10$                         | $38.208 \pm 24$                         |
| DNL-1                            | $17.858 \pm 7$                          | $15.618 \pm 8$                          | $37.818 \pm 22$                         |
| JP-2                             | $17.677 \pm 7$                          | $15.428 \pm 5$                          | $37.472 \pm 13$                         |
| GB-1                             | $18.538 \pm 9$                          | $15.584 \pm 7$                          | $38.093 \pm 21$                         |
| GBY-1                            | $18.755 \pm 7$                          | $15.575 \pm 6$                          | $38.448 \pm 17$                         |
| <i>Upper Basalt Formation</i>    |                                         |                                         |                                         |
| PL42                             | $18.421 \pm 11$                         | $15.612 \pm 11$                         | $38.518 \pm 30$                         |
| BVAO                             | $17.709 \pm 7$                          | $15.511 \pm 6$                          | $37.590 \pm 18$                         |
| AGH-4                            | $18.613 \pm 13$                         | $15.576 \pm 14$                         | $38.477 \pm 28$                         |
| PB-1                             | $18.318 \pm 7$                          | $15.554 \pm 7$                          | $36.898 \pm 19$                         |
| BVB-1                            | $18.106 \pm 10$                         | $15.475 \pm 9$                          | $37.914 \pm 23$                         |
| <i>Causeway Tholeiite Member</i> |                                         |                                         |                                         |
| PL1                              | $18.649 \pm 10$                         | $15.603 \pm 10$                         | $38.444 \pm 25$                         |
| JP49                             | $18.012 \pm 4$                          | $15.494 \pm 4$                          | $37.981 \pm 11$                         |
| CHQ-5                            | $18.786 \pm 6$                          | $15.607 \pm 8$                          | $38.667 \pm 18$                         |
| CHQ-1                            | $17.870 \pm 5$                          | $15.411 \pm 5$                          | $37.639 \pm 17$                         |

Pb was separated from whole-rock powders by anion exchange using HBr and HCl elutions. Total procedure blanks averaged 350 pg and were always below 600 pg. Isotope ratios were measured on a VG54E single-collector mass spectrometer. Instrumental mass fractionation of 1.5‰ per a.m.u. was corrected by repeated analyses of the NBS981 standard. Errors are 2 SEM but precision is limited by the reproducibility of NBS981 of 0.2‰.

$^{87}\text{Sr}/^{86}\text{Sr}_i > 0.707$  for Lower basalts,  $> 0.715$  for Causeway basalts) appears to have had relatively high  $^{206}\text{Pb}/^{204}\text{Pb}$  and it is the less radiogenic samples that approach most closely uncontaminated compositions. This difference is not unexpected, as it corresponds to major changes in crustal structure. Archaean (Lewisian) crust is a potential contaminant beneath Skye and Mull, and the occurrence of similar ancient granulite is likely beneath East Greenland. By contrast, there is unlikely to be Archaean crust beneath Northern Ireland.

The most likely crustal contaminants beneath Antrim are Neo-Proterozoic–Lower Palaeozoic (Dalradian) metasediments or mid-Proterozoic gneisses. Both are lithologically diverse and certainly heterogeneous in Sr and Pb isotope compositions (Fig. 2b; Dickin *et al.*, 1981;

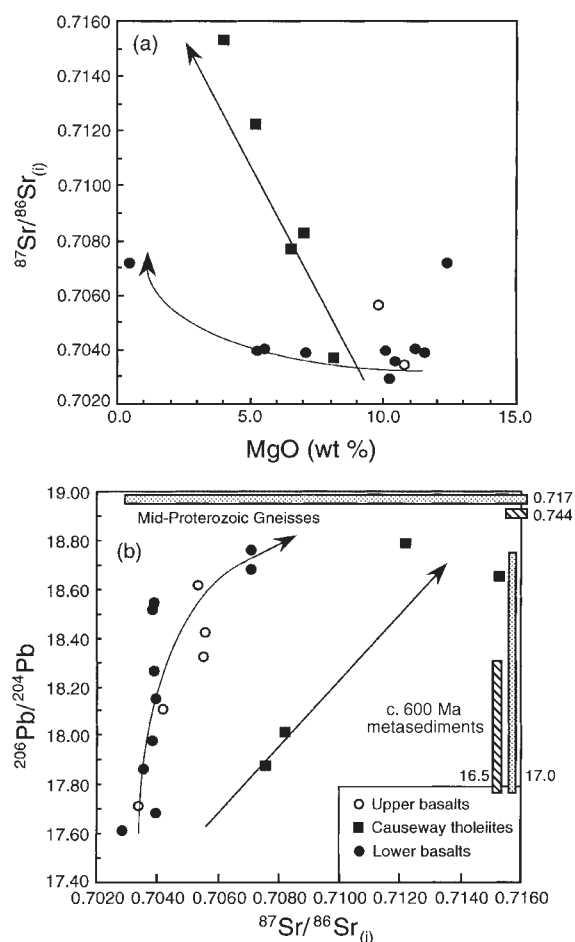

Fig. 2. (a)  $^{87}\text{Sr}/^{86}\text{Sr}$ –MgO relationships for the Palaeogene lavas of Northern Ireland. Evolved (low-MgO) lavas within the different lava series (Wallace *et al.*, 1994) tend to have the highest  $^{87}\text{Sr}/^{86}\text{Sr}$ , suggesting that they have incorporated radiogenic Sr and Pb during magmatic fractionation, which probably occurred within the continental crust, or perhaps, lithospheric mantle. (b)  $^{206}\text{Pb}/^{204}\text{Pb}$ – $^{87}\text{Sr}/^{86}\text{Sr}$  variations in the Antrim lavas, which indicate that elevated  $^{87}\text{Sr}/^{86}\text{Sr}$  is associated with relatively radiogenic Pb (i.e. high  $^{206}\text{Pb}/^{204}\text{Pb}$ ). Uncontaminated asthenospheric mantle compositions are therefore likely to lie on extrapolations of the inferred contamination trends towards low  $^{87}\text{Sr}/^{86}\text{Sr}$  and low  $^{206}\text{Pb}/^{204}\text{Pb}$ . Likely potential crustal contaminants beneath Antrim are mid-Proterozoic gneisses (stippled boxes) and Neo-Proterozoic–Lower Palaeozoic (Dalradian) metasediments (cross-hatched boxes), which have variable Sr–Pb isotope compositions. Figures indicate the extreme isotope compositions for these potential contaminants when they fall outside the range of the plot axes.

Marcantonio *et al.*, 1988). However, the extremely low  $^{206}\text{Pb}/^{204}\text{Pb}$  Archaean granulite signature is not anticipated beneath Antrim and it is entirely reasonable that a suitable mixture of lithologies exists beneath NE Ireland whose Pb isotope characteristics would result in contamination trends towards a relatively high  $^{206}\text{Pb}/^{204}\text{Pb}$  lithospheric end-member.

Significantly, the Skye, Mull and ODP Leg 152 samples with most radiogenic Pb have very similar Pb isotope

compositions to the lowest  $^{206}\text{Pb}/^{204}\text{Pb}$  Antrim samples. Thus, as we back-track along trends for these three datasets (Fig. 3a and e), which are thought to be mixing arrays between mantle-derived magmas and lithospheric contaminants, we arrive from diametrically opposed directions at relatively uncontaminated compositions that occupy a restricted region of Pb isotope space with  $^{206}\text{Pb}/^{204}\text{Pb} \sim 17.5$ ,  $^{207}\text{Pb}/^{204}\text{Pb} \sim 15.4$  and  $^{208}\text{Pb}/^{204}\text{Pb} \sim 37.4$ .

Thus, in the BTIP and SE Greenland sub-provinces where the basalts appear to be dominated by contamination of mantle-derived magmas by lithospheric materials it is possible to use the well-defined mixing trends to extrapolate towards uncontaminated compositions. Because the Skye–Mull–ODP Leg 152 and Antrim trends are towards very distinctive crustal contaminants, their intersection can be used to define a restricted range of uncontaminated composition, which appears to demand a common mantle end-member. For purely descriptive purposes we will refer to this putative end-member as NAEM (North Atlantic End-Member) to avoid any confusion with other postulated isotopic components (e.g. Zindler & Hart, 1986).

Elsewhere, the situation is less clear cut. Palaeogene basalts from West Greenland (Lightfoot *et al.*, 1997; Graham *et al.*, 1998) lack clear Pb–Pb isotope correlations (Fig. 3b and f) but the Pb isotope variation observed is not inconsistent with a source contribution from the NAEM. Lavas from NE Greenland (Thirlwall *et al.*, 1994; Ellam *et al.*, 1998), Central East Greenland (Hansen & Nielsen, 1999) and the Faeroes (Gariépy *et al.*, 1983) do not demand the involvement of a NAEM (Fig. 3c and g) but either lie on linear trends that pass through the proposed NAEM composition or define more diffuse fields, which clearly demand more complex petrogenetic schemes than simple binary source mixtures (e.g. Thirlwall *et al.*, 1994; Hansen & Nielsen, 1999).

Perhaps the most compelling evidence that the NAEM is indeed representative of a single component available throughout the NAIP comes from comparison of the Palaeogene flood basalts with Recent basalts from Iceland (Fig. 3). Iceland basalts define coherent Pb–Pb arrays (Fig. 3d and h), which, extrapolated to unradiogenic Pb isotope compositions, closely approach the NAEM composition and certainly intersect the area of overlap in Pb isotope space between the Skye, Mull, ODP Leg 152 and Antrim datasets. Thus, it seems plausible that the Iceland Pb–Pb arrays represent mixing between the NAEM composition and a more radiogenic Pb isotope composition with  $^{206}\text{Pb}/^{204}\text{Pb} \geq 19.4$ ,  $^{207}\text{Pb}/^{204}\text{Pb} \geq 15.56$  and  $^{208}\text{Pb}/^{204}\text{Pb} \geq 39.0$ . If so, we are led to conclude that NAEM has made a pervasive contribution to NAIP magmatism over the past 60 my.

Interestingly, the Pb isotope compositions of Palaeogene BTIP that have not undergone lithospheric

contamination (i.e. those that define the NAEM) are much more restricted than the present-day range for Icelandic basalts (Fig. 3). If the Iceland Pb–Pb arrays (Fig. 3d and h) document mixing between NAEM and some other end-member with relatively radiogenic Pb isotope ratios, then the latter appears not to have been as influential in generation of the Palaeogene CFB as it is in Icelandic petrogenesis today.

Pb–Sr and Pb–Nd co-variations (Fig. 4a and b) are not as coherent as those in Pb–Pb space, presumably indicating a substantial degree of Sr and Nd isotope heterogeneity in the various lithospheric contaminants that is not recorded by Pb isotopes. None the less, both diagrams show a fairly restricted area in which the Iceland, Skye, Mull, Antrim and ODP Leg 152 data overlap. This overlap provides a very rough constraint on the NAEM, suggesting  $^{87}\text{Sr}/^{86}\text{Sr} \sim 0.703$ ,  $\epsilon_{\text{Nd}} \sim +9$  [it should be noted that the Skye field in Fig. 4c is much reduced because Nd isotope data are not available for the samples studied for Sr and Pb isotopes by Moorbath & Thompson (1980) and Dickin *et al.* (1981) and the field therefore contains only the few  $^{143}\text{Nd}/^{144}\text{Nd}$  presented in Table 2 of this paper].

## CHARACTERISTICS OF THE NAEM

The identification of a single Pb isotope end-member throughout the NAIP is in itself significant but there are possibly additional implications in the particular Pb isotope composition identified for the NAEM. Most strikingly, the proposed end-member composition (i.e.  $^{206}\text{Pb}/^{204}\text{Pb} \sim 17.5$ ,  $^{207}\text{Pb}/^{204}\text{Pb} \sim 15.4$  and  $^{208}\text{Pb}/^{204}\text{Pb} \sim 37.4$ ) in  $^{207}\text{Pb}/^{204}\text{Pb}$ – $^{206}\text{Pb}/^{204}\text{Pb}$  space (Fig. 3) falls close to the intersection of the 4.55 Ga geochron with the northern hemisphere reference line (Hart, 1984). The geochron is the locus of  $^{207}\text{Pb}/^{204}\text{Pb}$ – $^{206}\text{Pb}/^{204}\text{Pb}$  compositions that are generated for different  $^{238}\text{U}/^{204}\text{Pb}$  ( $\mu$ ) over 4.55 Gy through single-stage (i.e. constant  $\mu$ ) Pb isotope evolution from an initial Pb isotope composition identical to that recorded by troilite (FeS) from the Canyon Diablo iron meteorite. Assuming that Canyon Diablo troilite represents initial Bulk Earth Pb, then the present-day Bulk Earth should lie on the geochron. However, most mantle and crustal rocks fall to the right of the geochron in  $^{207}\text{Pb}/^{204}\text{Pb}$ – $^{206}\text{Pb}/^{204}\text{Pb}$  space and the failure to identify a means by which such compositions could average to a position on the geochron is at the heart of the so-called Pb paradox (e.g. Zindler & Hart, 1986).

Identification of an NAEM Pb-isotope composition that lies on the 4.55 Ga geochron is therefore intriguing because such a composition could represent a primordial source that has remained intact since formation of the Earth. Speculation intensifies when the exact location of

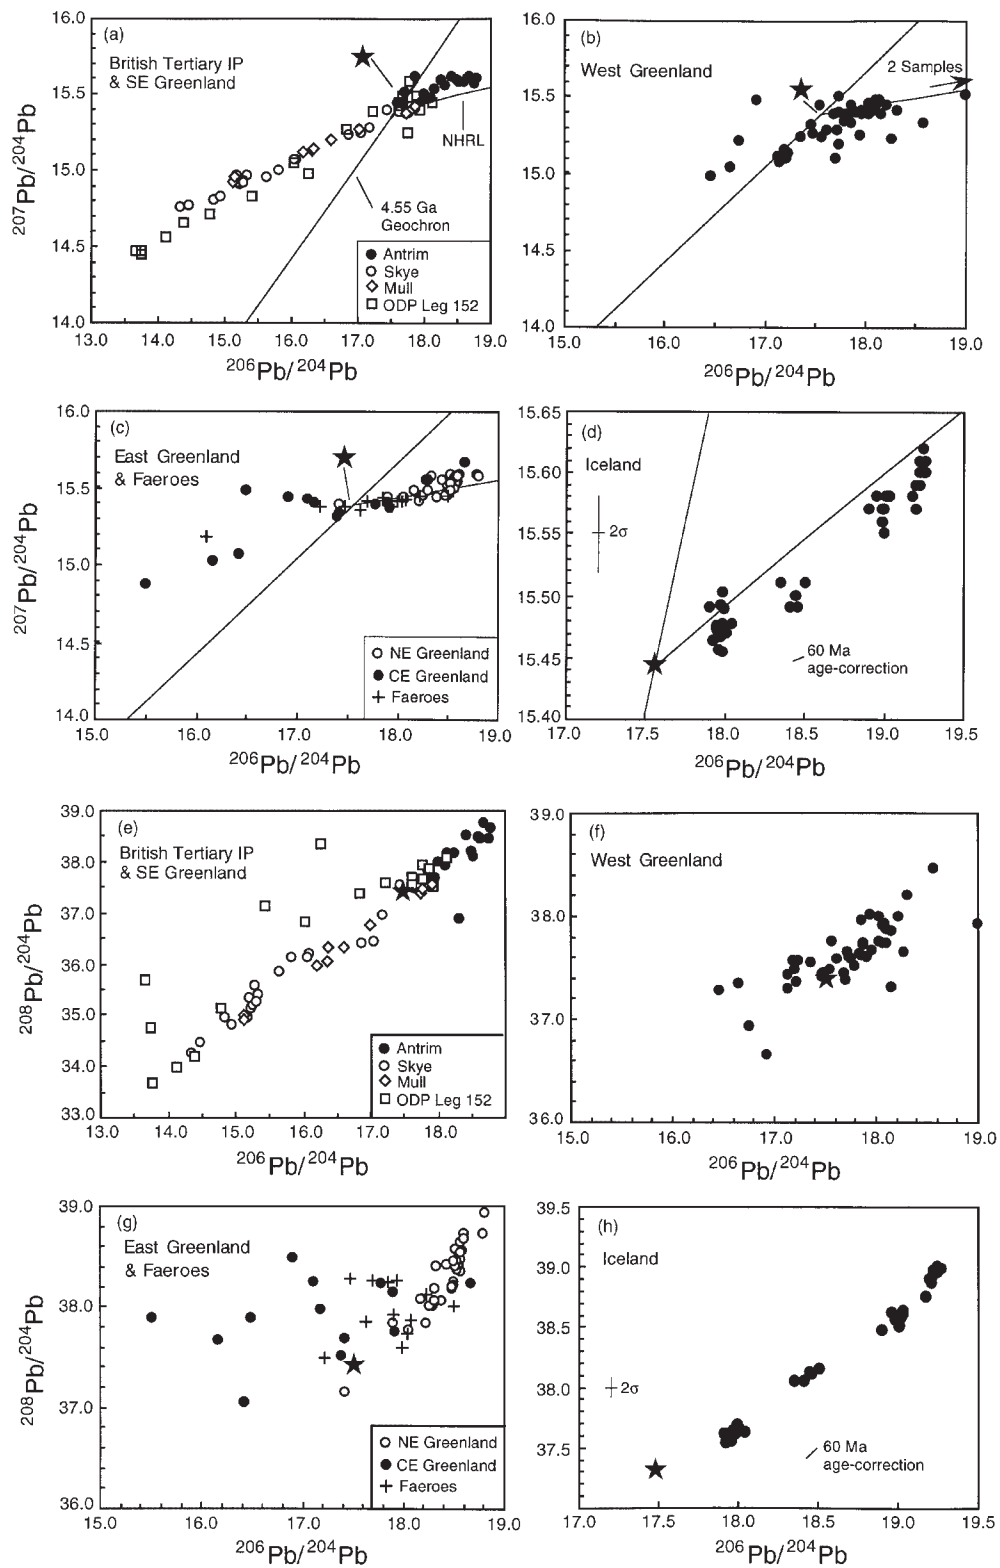

Table 2: Sr and Nd isotope compositions of lavas from Skye

| Sample | $^{87}\text{Sr}/^{86}\text{Sr}_{(0)}$ | $^{143}\text{Nd}/^{144}\text{Nd}_{(0)}$ |
|--------|---------------------------------------|-----------------------------------------|
| SK208  | $0.703\,599 \pm 18$                   | —                                       |
| BB1    | $0.704\,481 \pm 17$                   | $0.512\,877 \pm 6$                      |
| BH1    | $0.704\,844 \pm 18$                   | $0.512\,874 \pm 6$                      |
| INV1   | $0.704\,563 \pm 18$                   | $0.512\,564 \pm 6$                      |
| SR81   | $0.704\,093 \pm 21$                   | $0.512\,890 \pm 14$                     |
| SK057  | $0.703\,487 \pm 17$                   | $0.512\,777 \pm 9$                      |

Sr and Nd were separated using conventional ion exchange techniques with average total procedure blanks of 350 pg and 300 pg, respectively. Analyses were made using a VG Sector 54-30 multiple-collector mass spectrometer in dynamic mode. Ratios were normalized to  $^{86}\text{Sr}/^{88}\text{Sr} = 0.1194$  and  $^{146}\text{Nd}/^{144}\text{Nd} = 0.7219$ . NBS987 gave  $^{87}\text{Sr}/^{86}\text{Sr} = 0.710\,243 \pm 20$  (2 SD) and the laboratory Nd 'standard' (JM) gave  $0.511\,500 \pm 10$  (2 SD). Errors for individual samples are 2 SE.

the proposed end-member on the geochron is considered because values of  $^{206}\text{Pb}/^{204}\text{Pb} = 17.50$  and  $^{207}\text{Pb}/^{204}\text{Pb} = 15.36$  correspond to a single-stage evolution of Pb with  $\mu = 7.99$ , to all intents identical to the Bulk Earth  $\mu$  value of 8.0 (White, 1993). Furthermore, fixing  $\mu = 7.99$  yields a 4.55 Ga single-stage  $^{206}\text{Pb}/^{204}\text{Pb} = 37.4$  for a  $^{232}\text{Th}/^{238}\text{U}$  ( $\kappa$ ) = 3.93, which falls tantalizingly within the range of proposed Bulk Earth  $\kappa$  values of 3.8–4.2 (Galer & O'Nions, 1985; Allègre *et al.*, 1986).

Thus, the Pb isotope composition of the proposed NAEM is consistent with a primordial component although we would caution from the outset that such a component is by no means demanded by this observation. None the less, given the recent seismic evidence (Helmberger *et al.*, 1998; Shen *et al.*, 1998; Bijwaard & Spakman, 1999) that the Iceland plume originates within the lower mantle, coupled with the implications of two-layer mantle convection models (i.e. that the lower mantle could preserve a primordial composition), it is worth examining further the extent to which the proposed NAEM might represent a lower-mantle contribution.

The first evidence against a lower-mantle origin for the NAEM must be that the potentially primordial Pb isotope signature is not accompanied by primordial Sr or Nd. As noted above, the NAEM appears to be characterized by relatively low  $^{87}\text{Sr}/^{86}\text{Sr}$  and high  $\epsilon_{\text{Nd}}$ . More specifically, the least contaminated basalts from Antrim have  $^{87}\text{Sr}/^{86}\text{Sr}_i < 0.703$  (Wallace *et al.*, 1994) and  $^{143}\text{Nd}/^{144}\text{Nd}_i > 0.5130$  (Wallace, 1995), which correspond more closely to MORB values, thought to represent depleted upper mantle, than to the primordial (or Bulk Earth) values ( $^{87}\text{Sr}/^{86}\text{Sr} = 0.7045\text{--}0.7055$ ,  $^{143}\text{Nd}/^{144}\text{Nd} = 0.512638$ ) expected for lower mantle. Similarly, relatively uncontaminated basalts from Skye (Thirlwall & Jones, 1983; Table 2), Mull (Kerr *et al.*, 1995) and ODP Leg 152 (Fitton *et al.*, 1998) all have high  $^{143}\text{Nd}/^{144}\text{Nd}$  and low  $^{87}\text{Sr}/^{86}\text{Sr}$  compared with Bulk Earth values. Furthermore, the present-day Iceland hotspot magmatism is also characterized by high  $^{143}\text{Nd}/^{144}\text{Nd}$  and low  $^{87}\text{Sr}/^{86}\text{Sr}$  compared with Bulk Earth values. Thus, in all these examples, the apparent tendency towards primordial Pb is not accompanied by a well-developed Sr–Nd isotopic signature that might be considered primordial.

## HELIUM ISOTOPE EVIDENCE

Perhaps the least equivocal evidence for a primordial contribution to hotspot magmatism is the presence of high  $^3\text{He}/^4\text{He}$  ratios in some OIB. Some hot-spots are characterized by He isotope compositions that are much higher than the uniform value of  $8 \pm 1 R_a$  (where  $R_a$  represents the  $^3\text{He}/^4\text{He}$  of a sample normalized to the atmospheric  $^3\text{He}/^4\text{He}$ ,  $1.39 \times 10^{-6}$ ) that characterizes MORB. Loihi seamount, thought to mark the present axis of the Hawaii plume, and Iceland are the best examples of high- $^3\text{He}$  hot-spots, having  $^3\text{He}/^4\text{He} > 20 R_a$  (Allègre *et al.*, 1983, 1987; Kurz *et al.*, 1983; Rison & Craig, 1983; Valbracht *et al.*, 1997; Hilton *et al.*, 1999). High  $^3\text{He}/^4\text{He}$  values are indicative of a mantle source that through time has maintained a high  $^3\text{He}/(\text{Th} + \text{U})$  and is therefore relatively undegassed compared with the MORB source, which is widely accepted as the relatively depleted and degassed upper mantle. A popular

Fig. 3.  $^{207}\text{Pb}/^{204}\text{Pb}$ – $^{206}\text{Pb}/^{204}\text{Pb}$  and  $^{208}\text{Pb}/^{204}\text{Pb}$ – $^{206}\text{Pb}/^{204}\text{Pb}$  plots for lavas from (a, e) British Tertiary and SE Greenland; (b, f) West Greenland; (c, g) East Greenland and Faeroe Islands; (d, h) Iceland.  $^{207}\text{Pb}/^{204}\text{Pb}$ – $^{206}\text{Pb}/^{204}\text{Pb}$  plots (a–d) also illustrate a 4.55 Ga geochron and the northern hemisphere reference line (NHRL) of Hart (1984). Star symbol indicates the position of the proposed North Atlantic end-member (NAEM). Error bars (d, h) are  $2\sigma$  based on reproducibility of the NBS981 standard at SUERC. All Pb isotope data are present day; no attempt has been made to age-correct Palaeogene lavas to initial (eruption age) values because (1) U and Pb concentrations are not always available, (2) U/Pb ratios may be unreliable in altered samples, and (3) present-day data facilitate comparison between Tertiary lavas and Recent Iceland basalts assuming no significant (U,Th)–Pb fractionation in the petrogenesis of the former. However, an approximate 60 my age-correction based on  $^{238}\text{U}/^{204}\text{Pb} = 8$  and  $^{232}\text{Th}/^{238}\text{U} = 4$  is illustrated and shown to be small in comparison with the observed Pb isotope variations (d, h). Data sources are given in main text.

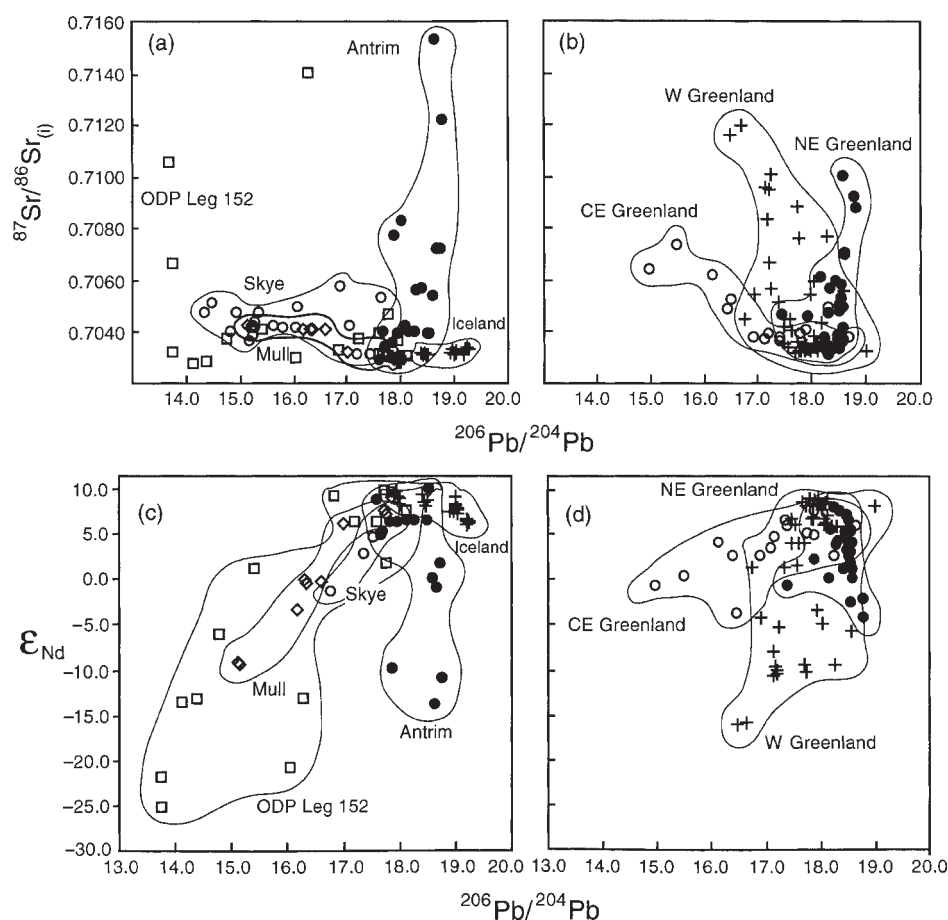

**Fig. 4.** (a, b)  $^{206}\text{Pb}/^{204}\text{Pb}$ – $^{87}\text{Sr}/^{86}\text{Sr}_i$  and (b)  $^{206}\text{Pb}/^{204}\text{Pb}$ – $\epsilon_{\text{Nd}}$  plots for North Atlantic Igneous Province lavas. Trends for the separate sub-provinces converge to define a relatively restricted area of overlap from which the approximate Sr and Nd isotope composition of the proposed North Atlantic end-member can be inferred.

paradigm equates this relatively undegassed reservoir with lower mantle beneath the 670 km seismic discontinuity (e.g. Kellogg & Wasserburg, 1990)—although there are alternative paradigms (Anderson, 1993; Phipps Morgan & Morgan, 1999). The high  $^3\text{He}/^4\text{He}$  of Icelandic basalts (Condomines *et al.*, 1983; Kurz *et al.*, 1985; Poreda *et al.*, 1986; Hilton *et al.*, 1999) is at least consistent with seismic evidence suggesting that the Iceland plume originates at the core–mantle boundary (Helmberger *et al.*, 1998; Shen *et al.*, 1998; Bijwaard & Spakman, 1999) and for the purposes of the following discussion we will assume that the lower mantle is indeed the source of high  $^3\text{He}/^4\text{He}$ .

The high diffusivity of He in most minerals at Earth's surface temperatures and the rapid accumulation in rocks of  $^4\text{He}$  through radioactive decay of U, Th and their daughter nuclides restricts the preservation of magmatic  $^3\text{He}/^4\text{He}$  in ancient basalts. However, for basalts that include abundant He-retentive and U, Th-poor minerals, principally olivine, the helium isotope composition of

ancient plume basalts can be measured and the involvement of a high  $^3\text{He}/^4\text{He}$  lower-mantle signature quantified (Basu *et al.*, 1993, 1995; Marty *et al.*, 1996, 1998; Graham *et al.*, 1998).

Helium isotope data are now available from olivine-rich basalts that cover much of the subaerially preserved NAIP. High  $^3\text{He}/^4\text{He} > 8 R_a$  (Fig. 5) have now been recorded at Hold with Hope, NE Greenland (Marty *et al.*, 1998), West Greenland (Graham *et al.*, 1998) and Skye (Stuart *et al.*, 2000). Here (Table 3) we present new data that extend He isotope coverage to the Prince of Wales Mountains (*c.* 69°N, 32°30'W, Fig. 1), in NE Greenland (Brown *et al.*, 1996). Two of the Prince of Wales Mountains samples have  $^3\text{He}/^4\text{He} > 8 R_a$ , although one of these is within error of the MORB range ( $8 \pm 1 R_a$ ). A third sample, whose unradiogenic Pb isotope compositions (Table 3) suggest substantial contamination with continental crust, has considerably lower  $^3\text{He}/^4\text{He}$  of *c.* 2  $R_a$ . The new data are therefore consistent with the above-mentioned recent studies, which have all found

Table 3: Pb and He isotope results for olivine basalts from the Prince of Wales Mountains, East Greenland

| Sample | $^{206}\text{Pb}/^{204}\text{Pb}_{(0)}$ | $^{207}\text{Pb}/^{204}\text{Pb}_{(0)}$ | $^{208}\text{Pb}/^{204}\text{Pb}_{(0)}$ | $^3\text{He}/^4\text{He}$ ( $R/R_a$ ) |
|--------|-----------------------------------------|-----------------------------------------|-----------------------------------------|---------------------------------------|
| EG2240 | $17.551 \pm 8$                          | $15.149 \pm 7$                          | $37.309 \pm 18$                         | $9.7 \pm 0.8$                         |
| EG2244 | $14.733 \pm 4$                          | $14.620 \pm 5$                          | $35.741 \pm 11$                         | $1.8 \pm 0.8$                         |
| EG3359 | $18.328 \pm 6$                          | $15.352 \pm 5$                          | $38.409 \pm 15$                         | $10.5 \pm 1.0$                        |

Pb techniques as for Table 1. He isotope ratios are normalized to the atmospheric ratio ( $1.39 \times 10^{-6}$ ;  $R_a$ ) and blank corrected on the basis of measured Ne abundances. Helium was extracted by *in vacuo* crushing using techniques described by Stuart *et al.* (1995). All errors are 2 SE. Details of sample localities and additional geochemical data have been given by Brown *et al.* (1996).

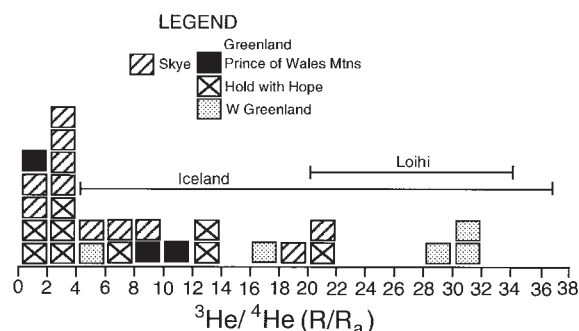

Fig. 5. Histogram showing recent helium isotope measurements on olivines from North Atlantic Igneous Province Palaeogene lavas and a comparison with the ranges from Iceland and Loihi Seamount, Hawaii. Data sources: Allègre *et al.* (1983, 1987); Kurz *et al.* (1983); Rison & Craig (1983); Valbracht *et al.* (1997); Graham *et al.* (1998); Marty *et al.* (1998); Hilton *et al.* (1999, table 3); Stuart *et al.* (2000).

$^3\text{He}/^4\text{He} > 8 R_a$  (Fig. 5) but also tended to discover substantial variability in  $^3\text{He}/^4\text{He}$ . A range of  $^3\text{He}/^4\text{He}$  is not unexpected because the samples studied all have complex petrogenesis—they are, after all, continental basalts. However, there is good reason to believe that the highest  $^3\text{He}/^4\text{He}$  values measured from each province are minima because the processes that could have affected  $^3\text{He}/^4\text{He}$  (i.e. crustal contamination and post-eruptive radiogenic in-growth) act to lower  $^3\text{He}/^4\text{He}$ . Only accumulation of cosmogenic  $^3\text{He}$  would raise  $^3\text{He}/^4\text{He}$  and all the recent studies have employed *in vacuo* crush release of magmatic helium, which minimizes the contribution from crystal-lattice-hosted helium that might be partly cosmogenic.

Thus, the observed high  $^3\text{He}/^4\text{He}$  ratios appear indicative of a lower-mantle contribution to basalt petrogenesis throughout the North Atlantic province from West Greenland to the BTIP. However,  $^3\text{He}/^4\text{He}$  ratios

that approach those of the highest values from Loihi seamount and Iceland (i.e.  $> 30 R_a$ ) have been encountered only in the West Greenland picrites (Graham *et al.*, 1998), which are thought to have been erupted within 200 km of the plume axis. We cannot rule out the possibility that towards the periphery of the plume similarly elevated magmatic  $^3\text{He}/^4\text{He}$  ratios have been reduced by crustal contamination, but it is tempting to infer that West Greenland  $^3\text{He}/^4\text{He}$  values are highest because they are closest to the plume axis and that the lower-mantle signature becomes diluted towards the periphery of the plume so that the NE Greenland and BTIP basalts preserve He isotope ratios ( $^3\text{He}/^4\text{He} \leq 21 R_a$ ) intermediate between Iceland plume ( $^3\text{He}/^4\text{He} \geq 37 R_a$ ) and MORB ( $^3\text{He}/^4\text{He} = 8 \pm 1 R_a$ ).

### He–Sr–Nd–Pb CO-VARIATIONS

Taking  $^3\text{He}/^4\text{He} > 8 R_a$  as indicative of a lower-mantle contribution, we might expect this signature to be most pronounced in samples with Pb isotope compositions close to the proposed NAEM. However, it is necessary to consider the possibility that distinctly non-linear mixing relationships might arise between upper- and lower-mantle end-members in He–Pb–Sr–Nd space. Best estimates (e.g. Kellogg & Wasserburg, 1990; O’Nions & Tolstikhin, 1994) of upper- and lower-mantle He concentrations suggest that the relatively undegassed lower mantle has of the order of 100 times higher He concentration than the degassed upper mantle. This is rather more contrast than expected for the moderately incompatible trace elements Pb, Sr and Nd, for which a 10 times concentration contrast between primitive lower mantle and depleted upper mantle seems a realistic maximum (e.g. McKenzie & O’Nions, 1995). Modelling mixing between relatively depleted upper mantle and a relatively enriched lower mantle whose helium characteristics are similar to the ‘primitive helium enriched mantle’ (PHEM) of Farley *et al.* (1992) results in distinctly non-linear mixtures (Fig. 6a and b). Imposing a lower-mantle  $^3\text{He}/^4\text{He}$  of 35–50  $R_a$  allows a mixture with 20  $R_a$  to be achieved with as little as 0.5% PHEM contribution, which results in a Pb isotope shift that is little larger than analytical error (Fig. 6a).

For Sr and Nd, the lower-mantle–upper-mantle contrast is likely to be less than for Pb for two principal reasons. First, Sr and Nd are slightly more compatible than Pb during mantle melting. The depleted mantle is therefore expected to be less depleted in Sr and Nd than in Pb. Hence, the contrast between lower and upper mantle will be smaller for Sr and Nd concentrations than for Pb abundance. Second, Pb is significantly more enriched in average continental crust (e.g. Taylor & McLennan, 1985; Rudnick, 1995) than are Sr and Nd.

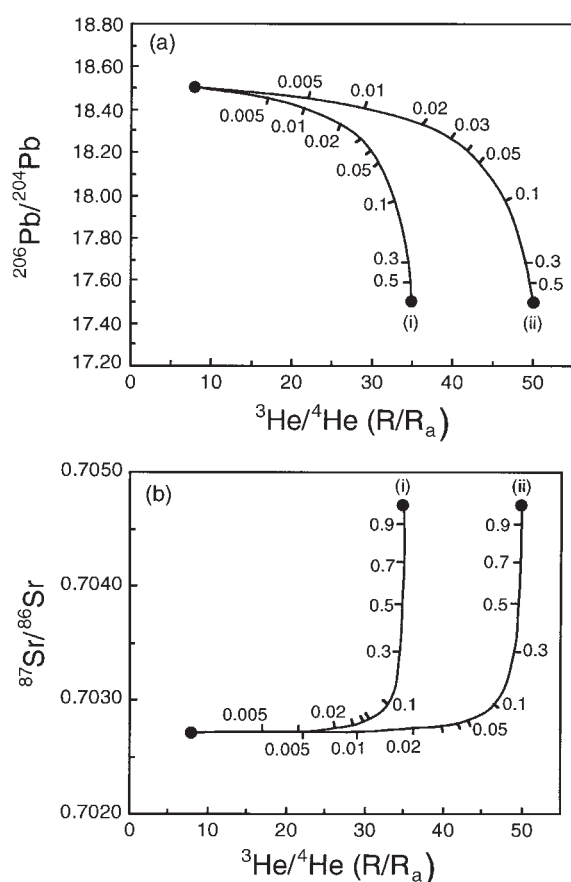

**Fig. 6.** Pb–He and Sr–He mixing relationships for mixtures of upper and lower mantle assuming the following characteristics. Lower mantle: He  $1 \times 10^{-9}$  mol/g,  $^3\text{He}/^4\text{He} =$  (i)  $35 R_a$ , (ii)  $50 R_a$ ; Pb 0.16 ppm,  $^{206}\text{Pb}/^{204}\text{Pb} = 17.5$ ,  $^{87}\text{Sr}/^{86}\text{Sr} = 0.7047$ . Upper mantle: He  $1 \times 10^{-11}$  mol/g,  $^3\text{He}/^4\text{He} = 8 R_a$ , Pb 0.016 ppm,  $^{206}\text{Pb}/^{204}\text{Pb} = 18.5$ ,  $^{87}\text{Sr}/^{86}\text{Sr} = 0.7027$ . Numbered tick marks indicate proportions of lower mantle in mixture. Even small (<1%) amounts of lower mantle are able to raise the He isotope compositions of mixtures to above  $20 R_a$  whereas Pb, and even more so Sr, remain dominated by the upper-mantle end-member.

That enrichment is likely to be ‘balanced’ by relative deficiency of Pb in the depleted upper mantle if, as widely held, the upper mantle is residual to continental crust extraction. He–Sr (Fig. 6b) and He–Nd (not illustrated) mixing relationships are therefore likely to be even more non-linear than that of He–Pb. Thus, although He isotopes may be a very sensitive indicator of lower-mantle involvement in hotspot magmatism, it is unlikely that Sr, Nd and Pb isotope signatures of the lower mantle can be inferred from the compositions of basalts that display high  $^3\text{He}/^4\text{He}$ .

One caveat must be that this inference depends greatly on our model assumption that even the highest  $^3\text{He}/^4\text{He}$  values measured in basalts are lower than the lower-mantle value. If, on the other hand, the basalts with highest  $^3\text{He}/^4\text{He}$  faithfully record lower-mantle  $^3\text{He}/^4\text{He}$ ,

then clearly this is a lower-mantle signature for all isotope systems. None the less, it will remain possible to approach closely lower-mantle  $^3\text{He}/^4\text{He}$  without approaching lower-mantle Sr, Nd or Pb isotope compositions. To date, values of  $^3\text{He}/^4\text{He} > 30 R_a$  are known only from Loihi seamount, Iceland and West Greenland basalts; these show similar, but not identical, Pb isotopes and, perhaps significantly, they do not approach the NAEM composition.

One additional matter that requires clarification is a potential misunderstanding that our observations above might be in conflict with the coherent and linear He–Pb isotope mixing relationships observed within the various Hawaiian volcanoes (Eiler *et al.*, 1998). That observation demonstrates persuasively that a high  $^3\text{He}/^4\text{He}$  Loihi component with distinctive Pb isotope characteristics contributes to the source regions of Hawaiian basalts and does so in similar measure for He and Pb. We do not dispute that interpretation but point out that the Loihi component itself is likely to be a mixture of source materials. The mixing process responsible for the Loihi component is therefore subject to exactly the same non-linearity as illustrated in Fig. 6 and it is possible to produce the Loihi component with dominantly lower-mantle He but upper-mantle Pb. Once constituted, the Loihi component can participate in further source mixing beneath Hawaii and effect similar leverage on such mixtures for both Pb and He. However, this in itself does not necessarily demonstrate a significant role for lower-mantle Sr, Nd and Pb.

Only if the Loihi component could be demonstrated to represent unadulterated lower mantle would it be appropriate to infer that its Sr, Nd and Pb isotopic compositions are similarly representative of lower mantle. Plausible lower-mantle  $^3\text{He}/^4\text{He}$  is no more constrained than  $> 37 R_a$  (e.g. Hilton *et al.*, 1999). Thus, an *a priori* assumption that the highest  $^3\text{He}/^4\text{He}$  measured at Loihi represents lower-mantle  $^3\text{He}/^4\text{He}$  seems imprudent. There remains sufficient latitude in the lower-mantle He isotope composition that the observed range in basalt  $^3\text{He}/^4\text{He}$  is consistent with a situation in which the lower-mantle contribution to even the most  $^3\text{He}$ -rich OIB remains sufficiently small that Sr, Nd and Pb are predominantly derived from the upper mantle.

Similarly, other elements that are more evenly distributed between upper and lower mantle than is He will be subject to the same non-linear mixing relationships. Most probably, this applies to all the commonly analysed incompatible lithophile elements. In particular, we would not expect the Nb/Y and Zr/Y diagrams used to distinguish Iceland basalts from MORB (Fitton *et al.*, 1997) to be significantly more sensitive to small contributions of lower-mantle material than we propose are Sr, Nd and Pb isotopes. It is notable that the recent NAIP He isotope data include samples with high  $^3\text{He}/^4\text{He}$  values

that have both positive (West Greenland, NE Greenland) and negative (BTIP)  $\Delta\text{Nb}$  (Fitton *et al.*, 1997). On the basis of their  $\Delta\text{Nb}$  value, Fitton *et al.* (1997) favoured a source for the Iceland plume predominantly within the upper mantle and an origin at the 670 km transition zone. Our data support that interpretation and also demand a minor contribution from high  $^3\text{He}/^4\text{He}$ , He-rich lower mantle.

The above analysis leads us to conclude that it is unlikely that any basalts sample lower mantle to sufficient degrees that their Sr, Nd and Pb isotope compositions approach lower-mantle values, and this conclusion is consistent with the simple observation that the high  $^3\text{He}/^4\text{He}$  OIB do not tend towards one particularly well-defined Sr, Nd and Pb isotope composition, and certainly do not approach Bulk Earth Sr or Nd. Similarly, the proposed NAEM is unlikely to represent lower-mantle Sr, Nd and Pb, and again this is consistent with its low  $^{87}\text{Sr}/^{86}\text{Sr}$  and high  $^{143}\text{Nd}/^{144}\text{Nd}$ . We conclude that the observation that the NAEM falls close to the 4.55 Ga geochron is not likely to be indicative of the involvement of primordial lower mantle and may be purely coincidental.

None the less, the implication remains that upper mantle with a Pb isotope composition that falls close to the geochron appears to be widely implicated in North Atlantic magmatism. Perhaps the most revealing aspect of the NAEM comes from comparison of the Palaeogene flood basalts and present-day Icelandic basalts. For Recent Icelandic magmatism, the NAEM is only one source component and the Iceland Pb–Pb arrays (Fig. 2d and h) trend away from the NAEM towards high  $^{206}\text{Pb}/^{204}\text{Pb}$ , implicating at least one other distinct mantle source in the petrogenesis of Icelandic basalts, which we will term the ‘Iceland radiogenic Pb end-member’.

In the examples we have used to identify the NAEM (i.e. Antrim, Skye, Mull and ODP Leg 152), the uncontaminated basalts always approach the NAEM itself, not an ‘average Icelandic’ composition lying between NAEM and the Iceland radiogenic Pb end-member. By contrast, relatively uncontaminated NE Greenland samples have Pb isotope compositions that fall towards the centre of the Iceland Pb–Pb arrays, and this has been interpreted (Thirlwall *et al.*, 1994) to indicate the availability of both relatively low  $^{206}\text{Pb}/^{204}\text{Pb}$  and relatively high  $^{206}\text{Pb}/^{204}\text{Pb}$  Icelandic end-members beneath NE Greenland 60 my ago. Given the scatter in the various Pb–Pb isotope arrays it is probably imprudent to attempt to distinguish these two viewpoints but it is worth noting that both have significant implications for the structure of the proto-Iceland plume.

On the basis of the BTIP and SE Greenland data, we might speculate that the Iceland radiogenic Pb end-member was not available during CFB production. This could indicate that the mantle plume beneath Iceland

has become progressively more heterogeneous as the radiogenic Pb end-member was incorporated into the plume. Alternatively, it may suggest that the source of radiogenic Pb is distinct from the plume and was simply not available to melt during the Tertiary; perhaps because it represents a small-scale upper-mantle heterogeneity currently convecting through the melting regime beneath Iceland. On the basis of the NE Greenland data, the radiogenic Pb Iceland end-member has been a pervasive component of the plume but only beneath Iceland today have conditions been such that it is sampled as a discrete entity. Elsewhere it was either efficiently mixed into the plume (NE Greenland) or absent (BTIP–SE Greenland). We are therefore inclined to speculate that the NAEM represents relatively deep-seated, but still predominantly upper-mantle, material whereas the Iceland radiogenic Pb end-member is derived from more transient shallow heterogeneities, which were sampled, at most only very sporadically, by the Palaeogene magmatism, but one of which is now present and fusible beneath Iceland.

## CONCLUSIONS

(1) Pb isotope variations, which are best interpreted as mixing trends between asthenospheric magmas and lithospheric contaminants, are well developed in basalts from the BTIP but indicate very different contaminants, allowing extrapolation to uncontaminated compositions along vectors that are diametrically opposed and that converge upon a restricted field taken to indicate a single sub-lithospheric end-member. This North Atlantic end-member (NAEM) also falls close to an extension of the Iceland  $^{206}\text{Pb}/^{204}\text{Pb}$ – $^{207}\text{Pb}/^{204}\text{Pb}$  and  $^{206}\text{Pb}/^{204}\text{Pb}$ – $^{208}\text{Pb}/^{204}\text{Pb}$  arrays towards low  $^{206}\text{Pb}/^{204}\text{Pb}$ , and therefore appears to have been present throughout the development of the 60 Ma to present North Atlantic–Iceland magmatic province. Data from other North Atlantic Tertiary centres are generally not inconsistent with the existence of the NAEM.

(2) The proposed NAEM has Pb isotope compositions ( $^{206}\text{Pb}/^{204}\text{Pb} \sim 17.5$ ,  $^{207}\text{Pb}/^{204}\text{Pb} \sim 15.4$  and  $^{208}\text{Pb}/^{204}\text{Pb} \sim 37.4$ ) that lie close to the 4.55 Ga geochron. That observation carries the possible implication that the NAEM is primordial, and given the obvious link with the Iceland plume and the common view that such plumes originate at great depth in the mantle, it is tempting to equate NAEM with a lower-mantle source component. However, consideration of the likely mixing relationships between lower and upper mantle leads to the conclusion that NAEM is unlikely to represent unadulterated lower mantle and that the similarity with a credible lower-mantle Pb isotope composition is more likely to be coincidental.

(3) Simple mixing models also suggest that the lower-mantle 'leverage' on mixtures of upper and lower mantle will be much greater for He than for Sr, Nd, Pb or, indeed, other lithophile trace elements. Unless we can be sure that the highest  $^3\text{He}/^4\text{He}$  OIB sampled lower mantle unadulterated by upper mantle, we cannot assume that any OIB carries more than a small (<1%) lower-mantle contribution and that is not sufficient for mixtures to approach lower-mantle Sr, Nd and Pb isotope compositions. Individual volcanic systems may well yield coherent He–Pb–Sr–Nd mixing relationships but this does not necessarily indicate that the high  $^3\text{He}/^4\text{He}$  component in such mixtures carries significant lower-mantle Sr, Nd and Pb. The high  $^3\text{He}/^4\text{He}$  end-member is itself likely to be a mixture of lower- and upper-mantle sources in which He is dominated by lower mantle but Sr, Nd and Pb are overwhelmingly derived from the upper mantle.

## ACKNOWLEDGEMENTS

R.M.E. was fortunate to be 'the boy geochemist' in Oxford for a couple of years, learning from Keith Cox's knowledge and wisdom, enjoying his enthusiasm and humour (of which the aforementioned sobriquet was an example) and, above all, benefiting from the respect and magnanimity with which Keith treated his junior colleagues. J. M. Curran and P. E. Brown provided the Antrim and Prince of Wales Mountains samples, respectively. V. Gallagher, S. Laß (SUERC) and P. Harrop (University of Manchester) are thanked for assistance with analyses. S. A. Gibson, A. C. Kerr and L. M. Larsen are thanked for thorough reviews. SUERC is supported by a consortium of Scottish Universities. This study was supported by NERC Grant GR9/3128.

## REFERENCES

- Allègre, C. J., Staudacher, Th., Sarda, Ph. & Kurz, M. (1983). Constraints on evolution of Earth's mantle from rare gas systematics. *Nature* **303**, 762–766.
- Allègre, C. J., Dupré, B. & Lewin, E. (1986). Thorium/uranium ratio of the Earth. *Chemical Geology* **56**, 219–227.
- Allègre, C. J., Staudacher, Th. & Sarda, Ph. (1987). Rare gas systematics: formation of the atmosphere, evolution and structure of the Earth's mantle. *Earth and Planetary Science Letters* **81**, 127–150.
- Anderson, D. L. (1993). Helium-3 from the mantle: primordial signal or cosmic dust. *Science* **261**, 170–176.
- Barrat, J. A. & Nesbitt, R. W. (1996). Geochemistry of the Tertiary volcanism of Northern Ireland. *Chemical Geology* **129**, 15–38.
- Basu, A. R., Renne, P. R., Dasgupta, D. K., Teichmann, F. & Poreda, R. J. (1993). Early and late alkali igneous pulses and a high-He-3 plume origin for the Deccan flood basalts. *Science* **261**, 902–906.
- Basu, A. R., Poreda, R. J., Renne, P. R., Teichmann, F., Vasiliev, Y. R., Sobolev, N. V. & Turrin, B. D. (1995). High-He-3 plume origin and temporal–spatial evolution of the Siberian flood basalts. *Science* **269**, 822–825.
- Bijwaard, H. & Spakman, W. (1999). Tomographic evidence for a narrow whole mantle plume beneath Iceland. *Earth and Planetary Science Letters* **166**, 121–126.
- Brown, P. E., Evans, I. B. & Becker, S. M. (1996). The Prince of Wales Formation—post-flood basalt alkali volcanism in the Tertiary of East Greenland. *Contributions to Mineralogy and Petrology* **123**, 424–434.
- Carlson, R. W., Lugmair, G. W. & Macdougall, J. D. (1984). Columbia River volcanism: the question of mantle heterogeneity or crustal contamination. *Geochimica et Cosmochimica Acta* **45**, 2483–2499.
- Condomines, M., Grönvold, K., Hooker, P. J., Muehlenbachs, K., O'Nions, R. K., Óskarsson, N. & Oxburgh, E. R. (1983). Helium, oxygen, strontium and neodymium isotopic relationships in Icelandic volcanics. *Earth and Planetary Science Letters* **66**, 125–136.
- Devey, C. W. & Cox, K. G. (1987). Relationships between crustal contamination and crystallisation in continental flood basalt magmas with special reference to the Deccan Traps of the Western Ghats, India. *Earth and Planetary Science Letters* **84**, 59–68.
- Dickin, A. P. (1981). Isotope geochemistry of Tertiary igneous rocks from the Isle of Skye, Scotland. *Journal of Petrology* **22**, 155–189.
- Dickin, A. P., Moorbath, S. & Welke, H. J. (1981). Isotope, trace element and major element geochemistry of Tertiary igneous rocks, Isle of Arran, Scotland. *Transactions of the Royal Society of Edinburgh* **72**, 159–170.
- Eiler, J. M., Farley, K. A. & Stolper, E. M. (1998). Correlated helium and lead isotope variations in Hawaiian lavas. *Geochimica et Cosmochimica Acta* **62**, 1977–1984.
- Ellam, R. M. & Cox, K. G. (1991). An interpretation of Karoo picrite basalts in terms of interaction between asthenospheric magmas and the mantle lithosphere. *Earth and Planetary Science Letters* **105**, 330–342.
- Ellam, R. M., Carlson, R. W. & Shirey, S. B. (1992). Evidence from Re–Os isotopes for plume–lithosphere mixing in Karoo flood basalt genesis. *Nature* **359**, 718–721.
- Ellam, R. M., Upton, B. G. J. & Fitton, J. G. (1998). Petrogenesis of late stage magmatism at Hold with Hope, East Greenland. *Contributions to Mineralogy and Petrology* **133**, 51–59.
- Farley, K. A., Natland, J. H. & Craig, H. (1992). Binary mixing of enriched and undegassed (primitive?) mantle components (He, Sr, Nd, Pb) in Samoan lavas. *Earth and Planetary Science Letters* **111**, 183–199.
- Fitton, J. G., Saunders, A. D., Norry, M. J., Hardarson, B. S., & Taylor, R. N. (1997). Thermal and chemical structure of the Iceland plume. *Earth and Planetary Science Letters* **153**, 197–208.
- Fitton, J. G., Hardarson, B. S., Ellam, R. M. & Rogers, G. (1998). Sr-, Nd-, and Pb-isotopic composition of volcanic rocks from the southeast Greenland margin at 63°N: temporal variations in crustal contamination during continental breakup. In: Saunders, A. D., Larsen, H. C. & Wise, S. W., Jr (eds) *Proceedings of the Ocean Drilling Program, Scientific Results, 152*. College Station, TX: Ocean Drilling Program, pp. 351–357.
- Fram, M. S. & Leshner, C. E. (1997). Generation and polybaric differentiation of East Greenland early Tertiary flood basalts. *Journal of Petrology* **38**, 231–275.
- Galer, S. J. G. & O'Nions, R. K. (1985). Residence time of thorium, uranium and lead in the mantle with implications for mantle convection. *Nature* **316**, 378–382.
- Gariépy, C., Ludden, J. & Brooks, C. (1983). Isotopic and trace element constraints on the genesis of the Faeroe lava pile. *Earth and Planetary Science Letters* **63**, 257–272.

- Graham, D. W., Larsen, L. M., Hanan, B. B., Storey, M., Pedersen, A. K. & Lupton, J. E. (1998). Helium isotope composition of the early Iceland mantle plume inferred from the Tertiary picrites of West Greenland. *Earth and Planetary Science Letters* **160**, 241–255.
- Hansen, H. & Nielsen, T. F. D. (1999). Crustal contamination in Palaeogene East Greenland flood basalts: plumbing system evolution during continental rifting. *Chemical Geology* **157**, 89–118.
- Hart, S. R. (1984). A large-scale isotope anomaly in the Southern Hemisphere mantle. *Nature* **309**, 753–757.
- Hawkesworth, C. J., Marsh, J. S., Duncan, A. R., Erlank, A. J. & Norry, M. J. (1984). The role of continental lithosphere in the generation of the Karoo volcanic rocks: evidence from combined Nd- and Sr-isotope studies. In: Erlank, A. J. (ed.) *Petrogenesis of the Volcanic Rocks of the Karoo Province. Geological Society of South Africa, Special Publication* **13**, 341–354.
- Hawkesworth, C. J., Mantovani, M. S. M., Taylor, P. N. & Palacz, Z. (1986). Evidence from the Parana of south Brazil for a continental contribution to Dupal basalts. *Nature* **322**, 356–359.
- Helmberger, D. V., Wen, L. & Ding, X. (1998). Seismic evidence that the source of the Iceland hotspot lies at the core-mantle boundary. *Nature* **396**, 251–255.
- Hilton, D. R., Grönvold, K., Macpherson, C. G. & Castillo, P. R. (1999). Extreme  $^3\text{He}/^4\text{He}$  ratios in northwest Iceland: constraining the common component in mantle plumes. *Earth and Planetary Science Letters* **173**, 53–60.
- Kamber, B. S. & Collerson, K. D. (1999). Origin of ocean island basalts: a new model based on lead and helium systematics. *Journal of Geophysical Research* **104**(B11), 25479–25491.
- Kellogg, L. & Wasserburg, G. J. (1990). The role of plumes in mantle helium fluxes. *Earth and Planetary Science Letters* **99**, 276–289.
- Kerr, A. C., Kempton, P. D. & Thompson, R. N. (1995). Crustal assimilation during turbulent magma ascent (ATA); new isotopic evidence from the Mull Tertiary lava succession, N.W. Scotland. *Contributions to Mineralogy and Petrology* **119**, 142–154.
- Kurz, M. D., Jenkins, W. J., Hart, S. R. & Clague, D. (1983). Helium isotope variations in volcanic rocks from Loihi seamount and the Island of Hawaii. *Earth and Planetary Science Letters* **66**, 388–406.
- Kurz, M. D., Meyer, P. S. & Sigurdsson, H. (1985). Helium isotope systematics within the neovolcanic zones of Iceland. *Earth and Planetary Science Letters* **74**, 291–305.
- Lawver, L. A. & Müller, R. D. (1994). Iceland hotspot track. *Geology* **22**, 311–314.
- Lightfoot, P. C., Hawkesworth, C. J., Olshefsky, K., Green, T., Doherty, W. & Keays, R. R. (1997). Geochemistry of Tertiary tholeiites and picrites from Qeqertarsuaq (Disko Island) and Nuussuaq, West Greenland with implications for the mineral potential of comagmatic intrusions. *Contributions to Mineralogy and Petrology* **128**, 139–163.
- Lyle, P. (1980). A petrological and geochemical study of the Tertiary basaltic lavas of northeast Ireland. *Journal of Earth Sciences, the Royal Dublin Society* **2**, 137–152.
- Marcantonio, F., Dickinson, A. P., McNutt, R. H. & Heaman, L. (1988). A 1,800-million-year-old Proterozoic gneiss terrane in Islay with implications for the crustal structure and evolution of Britain. *Nature* **335**, 62–64.
- Marty, B., Pik, R. & Gezahegn, Y. (1996). Helium isotopic variations in Ethiopian plume lavas: nature of magmatic sources and limit on lower mantle contribution. *Earth and Planetary Science Letters* **144**, 223–237.
- Marty, B., Upton, B. G. J. & Ellam, R. M. (1998). Helium isotopes in early Tertiary basalts, north-east Greenland: evidence for 58 Ma plume activity in the North Atlantic–Iceland volcanic province. *Geology* **26**, 407–410.
- McKenzie, D. & O’Nions, R. K. (1995). The source regions of ocean island basalts. *Journal of Petrology* **36**, 133–159.
- Menzies, M. A., Leeman, W. P. & Hawkesworth, C. J. (1984). Geochemical and isotopic evidence for the origin of continental flood basalts with particular reference to the Snake River Plain, Idaho, U.S.A. *Philosophical Transactions of the Royal Society of London, Series A* **310**, 643–660.
- Moorbath, S. & Thompson, R. N. (1980). Strontium isotope geochemistry and petrogenesis of the early Tertiary lava pile of the Isle of Skye, Scotland, and other basic rocks of the British Tertiary Province: an example of magma–crust interaction. *Journal of Petrology* **21**, 295–321.
- Old, R. A. (1975). The age and field relationships of the Tardree Tertiary rhyolite complex, County Antrim, N. Ireland. *Bulletin of the Geological Survey of Great Britain* **51**, 21–40.
- O’Nions, R. K. & Tolstikhin, I. N. (1994). Behaviour and residence times of lithophile and rare gas tracers in the upper mantle. *Earth and Planetary Science Letters* **124**, 131–138.
- Phipps Morgan, J. P. & Morgan, W. J. (1998). Two-stage melting and the geochemical evolution of the mantle: a recipe for mantle plum-pudding. *Earth and Planetary Science Letters* **170**, 215–239.
- Poreda, R. J., Schilling, J. G. & Craig, H. (1986). Helium and hydrogen isotopes in ocean ridge basalts north and south of Iceland. *Earth and Planetary Science Letters* **78**, 1–17.
- Rison, W. & Craig, H. (1983). Helium isotopes and mantle volatiles in Loihi Seamount and Hawaiian Island basalt and xenoliths. *Earth and Planetary Science Letters* **66**, 407–426.
- Rudnick, R. L. (1995). Making continental crust. *Nature* **378**, 571–578.
- Saunders, A. D., Fitton, J. G., Kerr, A. C., Norry, M. J. & Kent, R. W. (1997). The North Atlantic Igneous Province. In: Mahoney, J. J. & Coffin, M. F. (eds) *Large Igneous Provinces: Continental, Oceanic and Planetary Flood Volcanism. Geophysical Monograph, American Geophysical Union* **100**, 45–93.
- Shen, Y., Solomom, S. C., Bjarnason, I. Th. & Wolfe, C. J. (1998). Seismic evidence for a lower-mantle origin of the Iceland plume. *Nature* **395**, 62–65.
- Stuart, F. M., Burnard, P., Taylor, R. & Turner, G. (1995). Resolving mantle and crustal contributions to ancient hydrothermal fluids: He–Ar isotopes in fluid inclusions from Dae Hwa W–Mo mineralisation, S. Korea. *Geochimica et Cosmochimica Acta* **59**, 4663–4673.
- Stuart, F. M., Ellam, R. M., Harrop, P. J., Fitton, J. G. & Bell, B. R. (2000). Constraints on mantle plumes from the helium isotopic composition of basalts from the British Tertiary igneous province. *Earth and Planetary Science Letters* (in press).
- Taylor, S. R. & McLennan, S. M. (1985). *The Continental Crust: its Composition and Evolution*. Oxford: Blackwell, 312 pp.
- Thirlwall, M. F. & Jones, N. W. (1983). Isotope geochemistry and contamination mechanics of Tertiary lavas from Skye, Northwest Scotland. In: Hawkesworth, C. J. & Norry, M. J. (eds) *Continental Basalts and Mantle Xenoliths*. Nantwich, UK: Shiva, pp. 186–208.
- Thirlwall, M. F., Upton, B. G. J. & Jenkins, C. (1994). Interaction between continental lithosphere and the Iceland plume—Sr–Nd–Pb isotope geochemistry of Tertiary basalts, NE Greenland. *Journal of Petrology* **35**, 839–879.
- Thompson, R. N., Morrison, M. A., Dickinson, A. P. & Hendry, G. L. (1983). Continental flood basalts ... arachnids rule ok? In: Hawkesworth, C. J. & Norry, M. J. (eds) *Continental Basalts and Mantle Xenoliths*. Nantwich, UK: Shiva, pp. 158–185.
- Turner, S., Hawkesworth, C., Gallagher, K., Stewart, K., Peate, D. & Mantovani, M. (1996). Mantle plumes, flood basalts and thermal

- models for melt generation beneath continents: assessment of a conductive heating model and application to the Parana. *Journal of Geophysical Research* **101**, 11503–11518.
- Valbracht, P. J., Staudacher, Th., Malahoff, A. & Allègre, C. J. (1997). Noble gas systematics of deep rift zone glasses from Loihi Seamount, Hawaii. *Earth and Planetary Science Letters* **150**, 399–411.
- Wallace, J. M. (1995). Isotopic and geochemical constraints on the petrogenesis of the Tertiary flood basalts of NE Ireland. Ph.D. Thesis, Queen's University of Belfast, 308 pp.
- Wallace, J. M., Ellam, R. M., Meighan, I. G., Lyle, P. L. & Rogers, N. W. (1994). Sr isotope data for the Tertiary lavas of Northern Ireland: evidence for open system petrogenesis. *Journal of the Geological Society, London* **151**, 869–877.
- White, W. M. (1993).  $^{238}\text{U}/^{204}\text{Pb}$  in MORB and open system evolution of the depleted mantle. *Earth and Planetary Science Letters* **115**, 211–226.
- Zindler, A. & Hart, S. (1986). Chemical geodynamics. *Annual Review of Earth and Planetary Sciences* **14**, 493–571.
